# Supplementary material for: Pain Improvement in Parkinson’s Disease Patients Treated with Safinamide: Results from the SAFINONMOTOR Study
Source: MDPI journal article supplement (doi:10.3390/jpm11080798), 2021-08-16
Supplement: s1 [file s1]

**Table S1.** Data about sociodemographic aspects, comorbidities, antiparkinsonian drugs and other therapies at baseline.

|                              | N  |              |                           | N  |                 |
|------------------------------|----|--------------|---------------------------|----|-----------------|
| Age                          | 50 | 68.50 ± 9.12 | Time from diagnosis of PD | 48 | 6.39 ± 5.06     |
| Gender (females) (%)         | 50 | 58           |                           |    |                 |
| Race (%)                     | 50 |              | Motor fluctuations (%)    | 50 | 78              |
| - Caucasian                  | 50 | 98           | Dyskinesia (%)            | 50 | 30              |
| - Indian                     | 50 | 2            | Cognitive impairment (%)  | 50 | 4               |
| Civil status (%):            | 27 |              | Treatment for PD (%):     | 50 |                 |
| - Married                    |    | 70.4         | - Levodopa                |    | 94              |
| - Widowed                    |    | 22.2         | - Dopamine agonists:      |    | 66              |
| - Other                      |    | 7.4          | * Pramipexole             |    | 36              |
|                              |    |              | * Ropinirole              |    | 14              |
| Living style (%)             | 29 |              | * Rotigotine              |    | 18              |
| - With the partner           |    | 65.5         | - COMT inhibitor          |    | 34              |
| - With another family member |    | 27.6         | *Entacapone               |    | 16              |
| - Other                      |    | 7.2          | *Opicapone                |    | 18              |
| Habitat (%):                 | 30 |              | - Amantadine              |    | 8               |
| - Rural (< 5.000)            |    | 13.4         | - Anticholinergic drug    |    | 0               |
| - Semiurban (5.000-20.000)   |    | 23.3         | L-dopa daily dose (mg)    |    | 612.23 ± 423.4  |
| - Urban (> 20.000)           |    | 63.3         | DA daily dose (mg)        |    | 234.33 ± 96.19  |
| Comotbidities (%):           | 50 |              | LEDD (mg)                 |    | 810.21 ± 518.14 |
| - Arterial hypertension      |    | 40           | Other treatments (%):     | 50 |                 |
| - Diabetes mellitus          |    | 20           | - Antidepressant          |    | 32              |
| - Dyslipemia                 |    | 36           | - Benzodiazepine          |    | 38              |
| - Cardiopathy                |    | 10           | - Antipsychotic           |    | 4               |
| - Cardiac arrhythmia         |    | 12           | - Analgesic               |    | 22              |
| - Smoking                    |    | 10           | NSAIDs                    |    | 10              |
| - Alcohol consumption        |    | 12           | Opioid                    |    | 10              |
|                              |    |              | Paracetamol               |    | 8               |
|                              |    |              | AEDs                      |    | 8               |
|                              |    |              | Number of anti-PD drugs   | 50 | 2.27 ± 0.94     |
|                              |    |              | Total number of drugs     | 50 | 6.36 ± 3.14     |

The results represent % or mean ± SD. Cognitive impairment is with regards to the opinion of the neurologist (no dementia; MMS ≥ 26).

AEDs, antiepileptic drugs; COMT, catechol-O-methyltransferase; DA, dopamine agonist; LEDD, levodopa equivalent daily dose; NSAIDs, non-steroidal anti-inflammatory drugs; PD, Parkinson's disease.
