# Supplementary material for: Pain Improvement in Parkinson’s Disease Patients Treated with Safinamide: Results from the SAFINONMOTOR Study
Source: MDPI journal article supplement (doi:10.3390/jpm11080798), 2021-08-16
Supplement: s1 [file s1]

**Table S3.** Change in medications different of the introduction of safinamide after the baseline visit, from V1 to V4.

| Added medications or increased doses                                                                |
|-----------------------------------------------------------------------------------------------------|
| 1 patient adding atorvastatina 1 day after V1 and <b>escitalopram</b> to 20 mg/day 93 days after V1 |
| 1 patient adding 25/100 mg/day of <b>carbidopa/levodopa</b> IR 6 days after V1                      |
| 1 patient adding lansoprazol 62 days after V1 and <b>rotigotine</b> to 8 mg/day 63 days after V1    |
| 1 patient increasing the dose of <b>levodopa</b> IR from 500 to 600 mg/day 102 days after V1        |
| 1 patient adding vitamin B12 144 days after V1                                                      |
| 1 patient adding 25/100 mg/day of <b>carbidopa/levodopa retard</b> 182 days after V1                |
| 1 patient adding rosuvastatin 182 days after V1                                                     |
| Medications withdrawn or doses decreased                                                            |
| 1 patient withdrawing amlodipin/valsartan/hydrochlorothiazide 42 days after V1                      |

IR, immediate release.
