# Supplementary material for: Pain Improvement in Parkinson’s Disease Patients Treated with Safinamide: Results from the SAFINONMOTOR Study
Source: MDPI journal article supplement (doi:10.3390/jpm11080798), 2021-08-16
Supplement: s1 [file s1]

**Table S2.** Adverse events in patients from V1 to V4.

|                                                                                                | N       |
|------------------------------------------------------------------------------------------------|---------|
| Total AEs, N                                                                                   | 21      |
| - Nausea                                                                                       | 3       |
| - Dyskenia                                                                                     | 3       |
| - Diurnal somnolence                                                                           | 2       |
| - Urinary infection                                                                            | 1       |
| - Dizziness                                                                                    | 1       |
| - Pneumonia                                                                                    | 1       |
| - Respiratory insufficiency                                                                    | 1       |
| - Rash                                                                                         | 1       |
| - Diurnal somnolence                                                                           | 1       |
| - Dry mouth                                                                                    | 1       |
| - Insomnia                                                                                     | 1       |
| - Increased appetite                                                                           | 1       |
| - Abdominal pain                                                                               | 1       |
| - Constipation                                                                                 | 1       |
| - Urinary incontinence                                                                         | 1       |
| - Deep brain stimulation surgery                                                               | 1       |
| Patients with at least one AE, N (%)                                                           | 16 (32) |
| At least possibly related AEs, N                                                               | 14      |
| Patients with at least possibly* related to safinamide AEs, N (%)                              | 9 (18)  |
| Total SAEs, N                                                                                  | 5       |
| - Urinary infection                                                                            | 1       |
| - Pneumonia                                                                                    | 1       |
| - Respiratory insufficiency                                                                    | 1       |
| - Dizziness                                                                                    | 1       |
| - Deep brain stimulation surgery                                                               | 1       |
| Patients with at least one SAE, N (%)                                                          | 5 (10)  |
| At least possibly* related to safinamide SAEs, N                                               | 0       |
| Patients with at least possibly related to safinamide SAEs, N (%)                              | 0 (0)   |
| Patients with at least one AE leading to discontinuation, N (%)                                | 4 (8)   |
| Patients with at least one possibly* related to safinamide AE leading to discontinuation N (%) | 1 (2)   |
| Deaths, N (%)                                                                                  | 0 (0)   |

\*Considered “possibly”, “probably” or “definitely” related to treatment (safinamide). AE, adverse event; SAE, serious adverse event.
